# Supplementary material for: Spectral Smoothness of Ground Plane Backed Log-Periodic Dipole Antennas for Radioastronomical Applications
Source: Hindawi journal article supplement (doi:10.1155/2024/1399941), 2024-02-07
Supplement: f1 [file 1399941.f1.pdf]

# Spectral effects of a circular ground plane on a large array

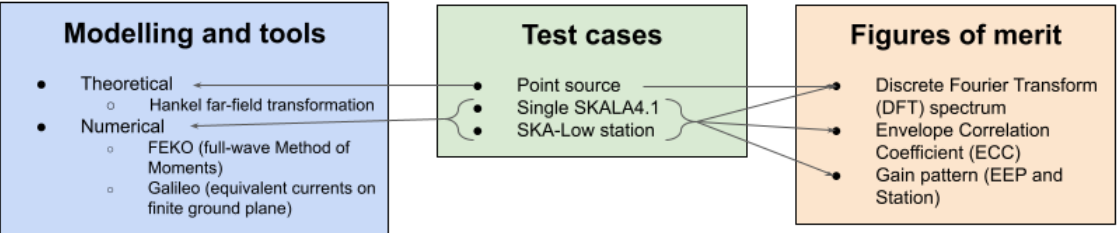

Flowchart of the Test Cases of this paper, as well as the Modelling and Tools used for computation and the Figures of Merit used for evaluation. Arrows and brackets show the resources used for one or more test cases
